# Supplementary material for: Association between exacerbation history and airway microbiota assessed by extended bacterial culture and metagenomic approaches in stable COPD
Source: Research Square preprint supplement (doi:10.21203/rs.3.rs-6206453/v1), 2025-03-31
Supplement: Supplementary file 1 [file 044b32af74fa01e3c951dedc.docx]

ORIGINAL RESEARCH

Lecomte-Thenot *et al.*

**Supplementary material**

**Association between exacerbation history and airway microbiota assessed by extended bacterial culture and metagenomic approaches in stable COPD**

**Figure S1. Workflow for 16S rRNA Data Acquisition and Quality Control.**

**
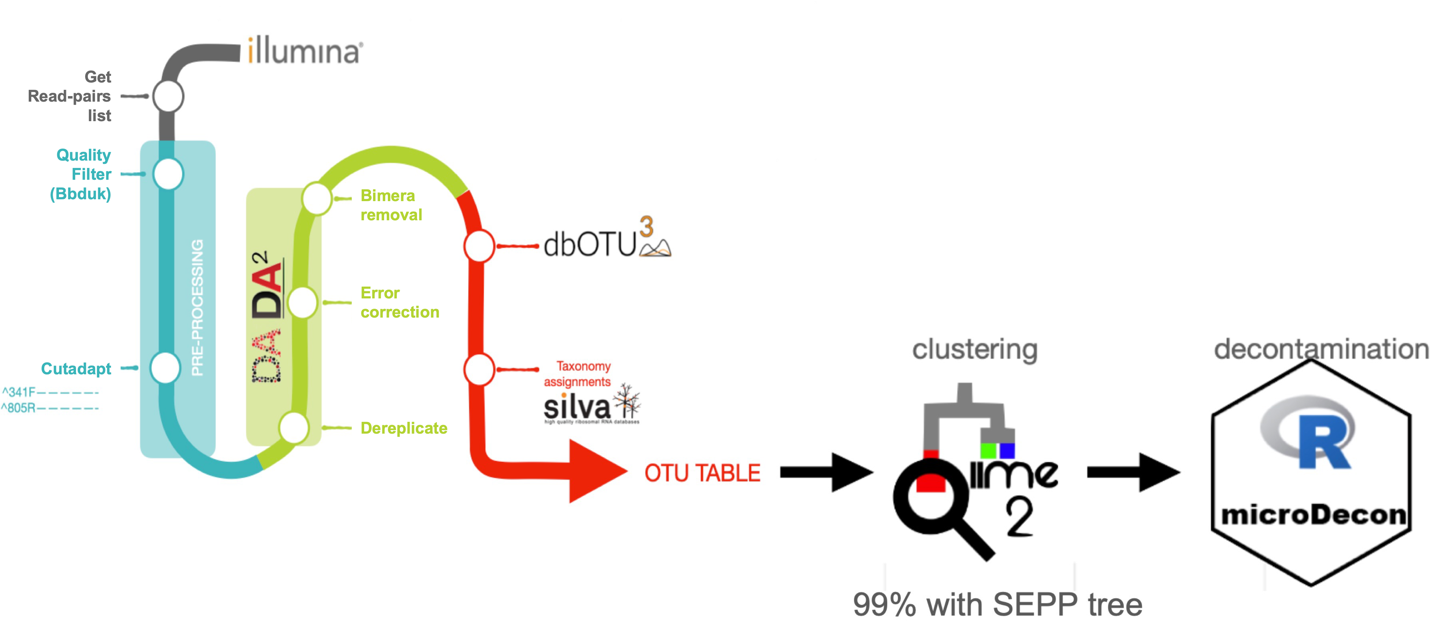
**

**Figure S2. Rarefaction curves of 16S rRNA sequencing data after decontamination.**

**
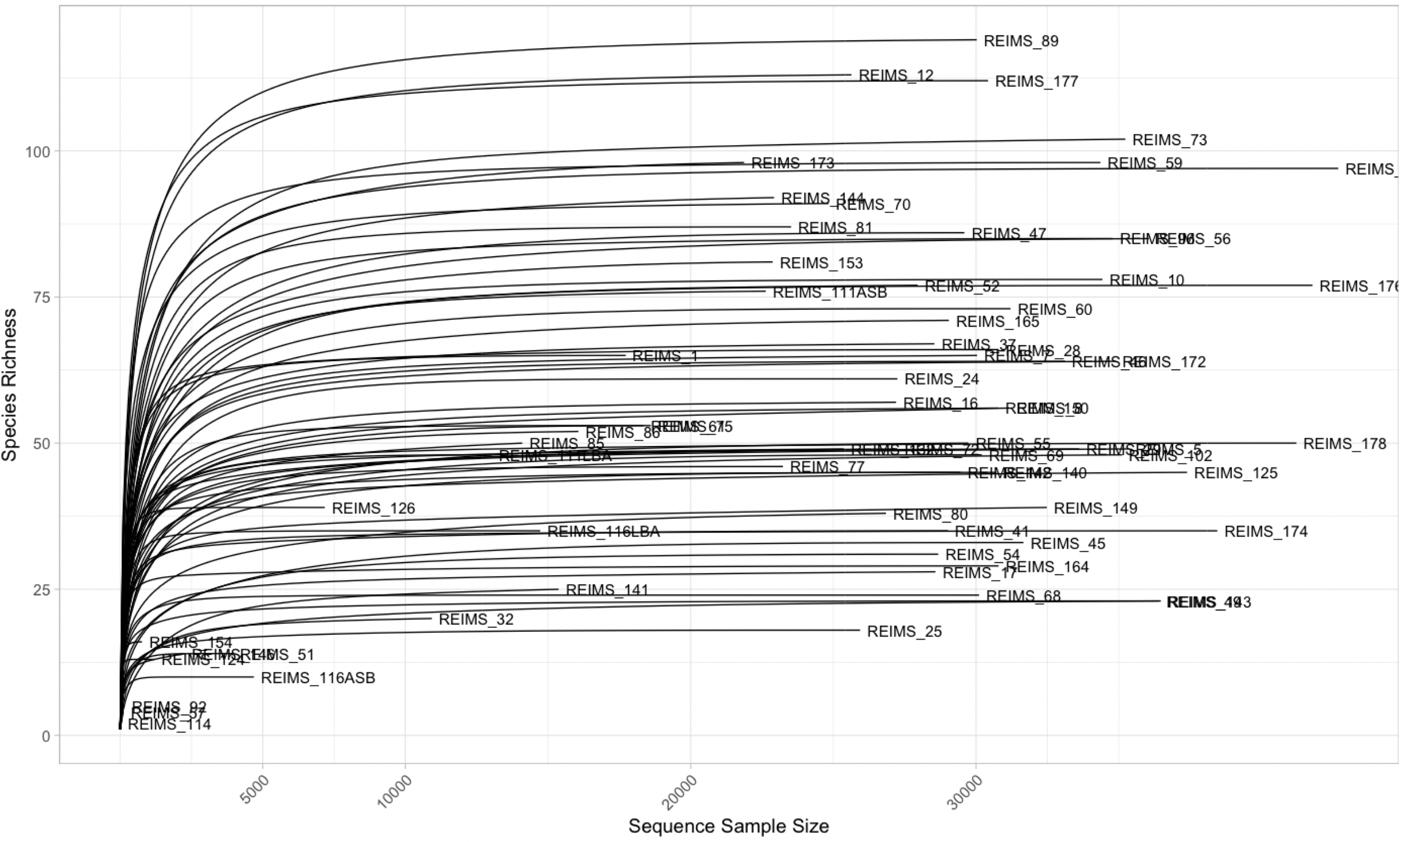
**

**Table S1: Prevalence and quantification of bacteria in low and high risk groups assessed by extended culture.**

| **Low risk group** | **Number of patients (n=28)** | **%** | **Median concentration (CFU/mL)** |
| --- | --- | --- | --- |
| *Actinomyces odontolyticus* | 7 | 25.00 | 1000000 |
| *Actinomyces oris* | 8 | 28.57 | 1000000 |
| *Citrobacter freundii* | 1 | 3.57 | 1000000 |
| *Enterobacter cloacae* | 1 | 3.57 | 100000 |
| *Enteroccocus faecalis* | 1 | 3.57 | 10000 |
| *Escherichia coli* | 2 | 7.14 | 50500 |
| *Gemella haemolysans* | 1 | 3.57 | 100000 |
| *Gemella sanguinis* | 1 | 3.57 | 100000 |
| *Granulicatella adiacens* | 2 | 7.14 | 50005000 |
| *Haemophilus influenzae* | 4 | 14.29 | 10000000 |
| *Haemophilus parainfluenzae* | 4 | 14.29 | 1000000 |
| *Lactobacillus delbrueckii* | 1 | 3.57 | 100000 |
| *Lactobacillus fermentum* | 1 | 3.57 | 1000000 |
| *Lactobacillus gasseri* | 1 | 3.57 | 100000 |
| *Lactobacillus paracasei* | 3 | 10.71 | 10000 |
| *Lactobacillus rhamnosus* | 2 | 7.14 | 25500 |
| *Lactobacillus salivarius* | 1 | 3.57 | 100000 |
| *Lactococcus lactis* | 1 | 3.57 | 100000 |
| *Micrococcus luteus* | 2 | 7.14 | 5500 |
| *Moraxella catarrhalis* | 1 | 3.57 | 50000000 |
| *Neisseria perflava/flavescens* | 8 | 28.57 | 1000000 |
| *Neisseria subflava/macacae/mucosa* | 4 | 14.29 | 55000000 |
| *Prevotella melaninogenica* | 2 | 7.14 | 5500000 |
| *Prevotella salivae* | 1 | 3.57 | 10000000 |
| *Propionibacterium acnes* | 1 | 3.57 | 100000 |
| *Proteus mirabilis* | 1 | 3.57 | 1000 |
| *Pseudomonas aeruginosa* | 2 | 7.14 | 550 |
| *Rothia aeria* | 5 | 17.86 | 100000 |
| *Rothia dentocariosa* | 11 | 39.29 | 100000 |
| *Rothia mucilaginosa* | 13 | 46.43 | 1000000 |
| *Selenomonas artemidis* | 1 | 3.57 | 1000000 |
| *Staphylococcus aureus* | 5 | 17.86 | 10000000 |
| *Staphylococcus haemolyticus* | 1 | 3.57 | 10000000 |
| *Streptococcus agalactiae* | 1 | 3.57 | 10000 |
| *Streptococcus cristatus* | 3 | 10.71 | 1000000 |
| *Streptococcus gordonii* | 1 | 3.57 | 1000000 |
| *Streptococcus mutans* | 4 | 14.29 | 100000 |
| *Streptococcus oralis/mitis/pneumoniae* | 25 | 89.29 | 10000000 |
| *Streptococcus parasanguinis* | 12 | 42.86 | 5500000 |
| *Streptococcus peroris* | 1 | 3.57 | 100000000 |
| *Streptococcus salivarius/vestibularis* | 14 | 50.00 | 1000000 |
| *Streptococcus sanguinis* | 6 | 21.43 | 3000000 |
| *Veillonella parvula/dispar/ atypica* | 16 | 57.14 | 5500000 |

| **High risk group** | **number of patients (n=34)** | **%** | **Median concentration (CFU/mL)** |
| --- | --- | --- | --- |
| *Actinomyces graevenitzii* | 3 | 8.8 | 1000000 |
| *Actinomyces naeslundii* | 1 | 2.9 | 1000000 |
| *Actinomyces odontolyticus* | 5 | 14.7 | 100000 |
| *Actinomyces oris* | 6 | 17.6 | 100000 |
| *Aggregatibacter aphrophilum* | 1 | 2.9 | 1000000 |
| *Aggregatibacter segnis* | 1 | 2.9 | 1000000000 |
| *Bifidobacterium dentium* | 1 | 2.9 | 1000 |
| *Citrobacter braakii* | 1 | 2.9 | 10000000 |
| *Citrobacter koseri* | 1 | 2.9 | 1000000 |
| *Corynebacterium durum* | 1 | 2.9 | 1000000000 |
| *Corynebacterium propinquum* | 1 | 2.9 | 1000000 |
| *Enterobacter cloacae* | 1 | 2.9 | 1000000 |
| *Enteroccocus faecalis* | 1 | 2.9 | 1000000 |
| *Escherichia coli* | 4 | 11.8 | 500500 |
| *Gemella haemolysans* | 3 | 8.8 | 10000000 |
| *Gemella sanguinis* | 1 | 2.9 | 10000 |
| *Granulicatella adiacens* | 1 | 2.9 | 10000000000 |
| *Haemophilus influenzae* | 2 | 5.9 | 50050000 |
| *Haemophilus parahaemolyticus* | 2 | 5.9 | 100000 |
| *Haemophilus parainfluenzae* | 8 | 23.5 | 1000000 |
| *Hafnia alvei* | 1 | 2.9 | 1000000 |
| *Klebsiella oxytoca* | 2 | 5.9 | 5050000 |
| *Lactobacillus fermentum* | 5 | 14.7 | 10000 |
| *Lactobacillus paracasei* | 2 | 5.9 | 5500 |
| *Lactobacillus plantarum* | 1 | 2.9 | 100000 |
| *Lactobacillus salivarius* | 1 | 2.9 | 10000000 |
| *Micrococcus luteus* | 1 | 2.9 | 100000 |
| *Moraxella catarrhalis* | 5 | 14.71 | 10000000 |
| *Moraxella osloensis* | 1 | 2.9 | 1000 |
| *Morganella morganii* | 1 | 2.9 | 5000000 |
| *Neisseria elongata* | 1 | 2.9 | 1000000000 |
| *Neisseria perflava/flavescens* | 12 | 35.3 | 5500000 |
| *Neisseria subflava/macacae/mucosa* | 10 | 29.4 | 550000 |
| *Paracoccus yeei* | 1 | 2.9 | 1000 |
| *Parvimonas micra* | 1 | 2.9 | 10000 |
| *Porphyromonas endodontalis* | 1 | 2.9 | 50000 |
| *Prevotella denticola* | 1 | 2.9 | 10000 |
| *Propionibacterium acnes* | 1 | 2.9 | 10000000 |
| *Pseudomonas aeruginosa* | 2 | 5.9 | 5000050 |
| *Pseudomonas koreensis* | 1 | 2.9 | 1000 |
| *Raoultella ornithinolytica* | 1 | 2.9 | 10000000 |
| *Rhizobium radiobacter* | 1 | 2.9 | 100000000 |
| *Rothia aeria* | 3 | 8.8 | 1000000 |
| *Rothia dentocariosa* | 11 | 32.4 | 1000000 |
| *Rothia mucilaginosa* | 16 | 47.1 | 1000000 |
| *Staphylococcus aureus* | 4 | 11.8 | 55000 |
| *Staphylococcus epidermidis* | 1 | 2.9 | 100000 |
| *Staphylococcus hominis* | 1 | 2.9 | 10000000 |
| *Stenotrophomonas maltophilia* | 1 | 2.9 | 1000000 |
| *Streptococcus constellatus* | 3 | 8.8 | 10000000 |
| *Streptococcus cristatus* | 2 | 5.9 | 5500000 |
| *Streptococcus gordonii* | 3 | 8.8 | 10000000 |
| *Streptococcus oralis/mitis/pneumoniae* | 31 | 91.2 | 1000000 |
| *Streptococcus parasanguinis* | 11 | 32.4 | 1000000 |
| *Streptococcus salivarius/vestibularis* | 16 | 47.1 | 1000000 |
| *Streptococcus sanguinis* | 7 | 20.6 | 10000000 |
| *Veillonella denticariosa* | 1 | 2.9 | 10000 |
| *Veillonella parvula/dispar/ atypica* | 18 | 52.9 | 55000 |
